# Supplementary material for: Current Oceanic CO2 Uptake: The Priming Effect of the Marine Carbon Pumps
Source: Research Square preprint supplement (doi:10.21203/rs.3.rs-5930695/v1), 2025-02-05
Supplement: Supplementary file 2 [file a556bddac004917d2078aa4d.pdf]

Fig. S1

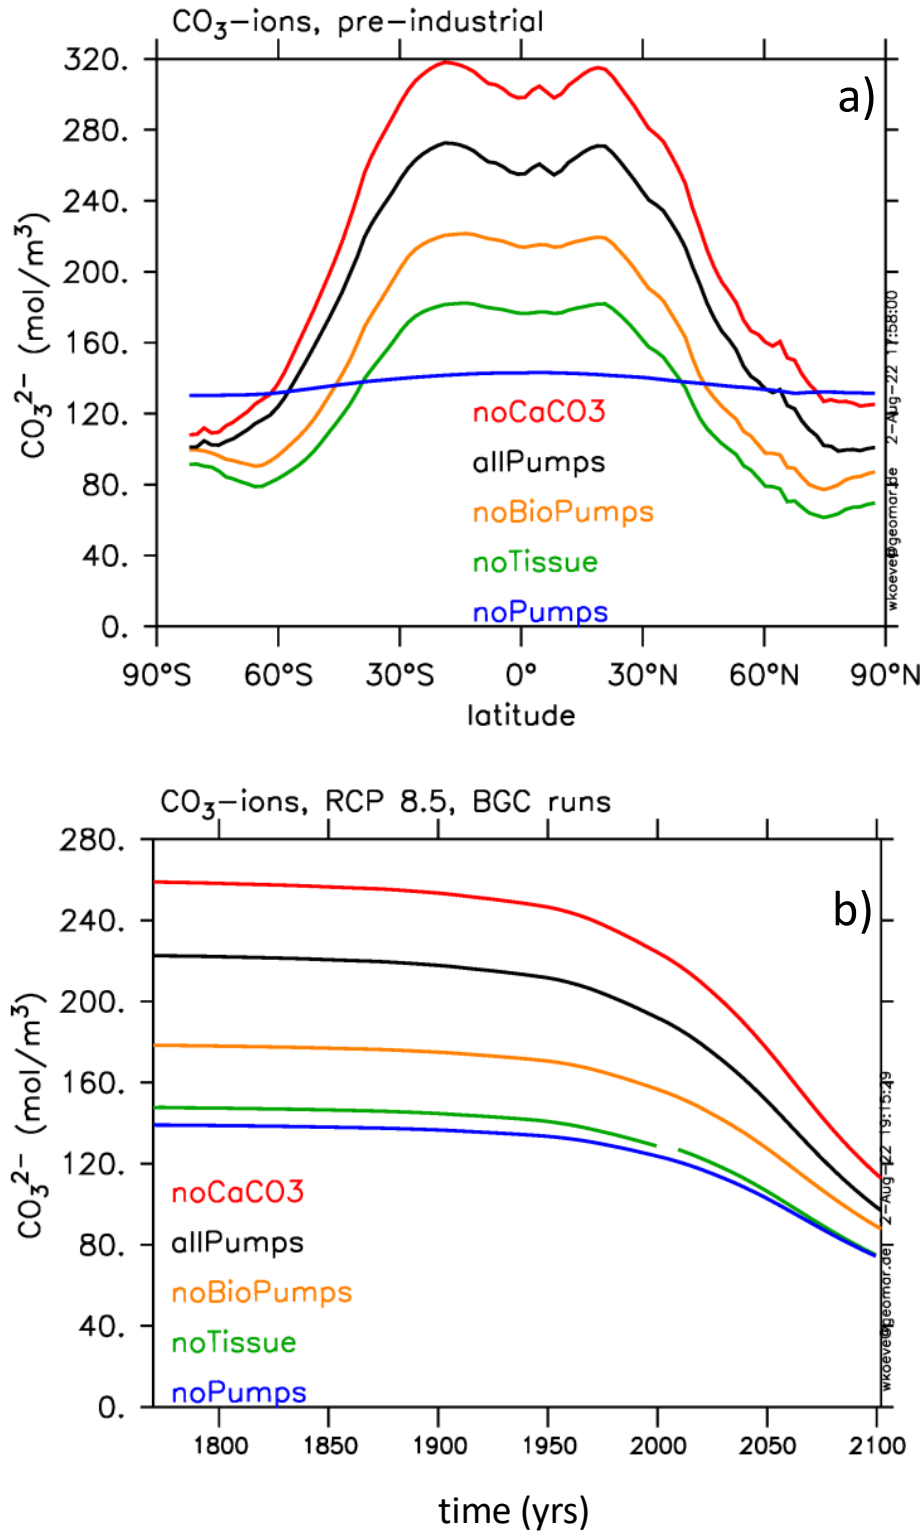

**Fig. S1.** Surface ocean carbonate ion concentration in BGC experiments with different model variants. (a) Preindustrial zonally averaged surface carbonate ion concentration, (b) Global mean surface carbonate ion concentration between 1765 and 2100. Model variants (allPumps, black; noBioPumps, orange; noTissue, green; noCaCO<sub>3</sub>, red; noPumps, blue) are as indicated in the caption of Fig. S1 and described in more detail in Online Methods.
